# Supplementary material
Source: Springer Nature journal article supplement (https://www.springermedizin.de/resource/supplementary/13058_2009_2443_MOESM10_ESM.pdf/9701424)

A.

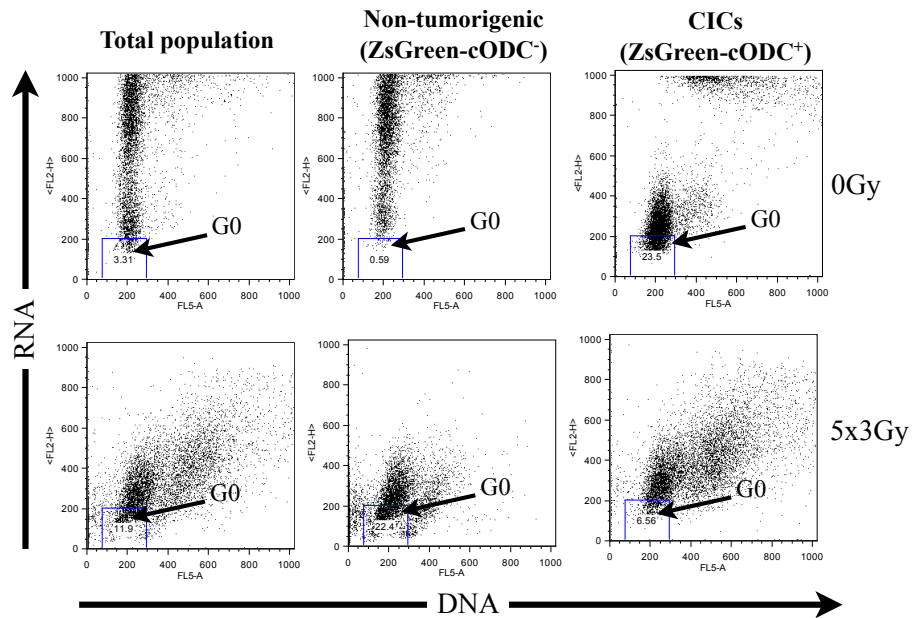

B.

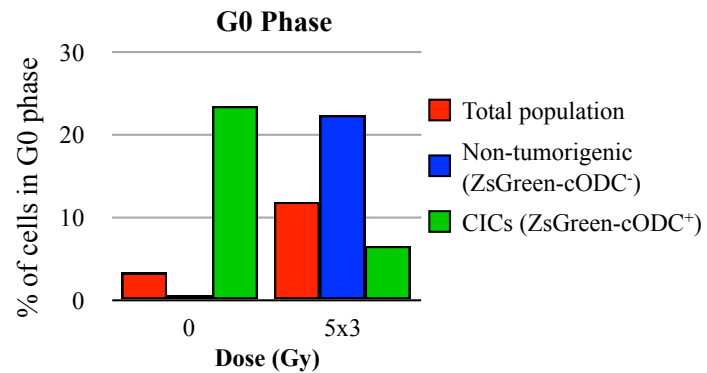

Supplement: MOESM10 [file 9701424]
